# Supplementary material for: Hepatic overproduction of 13-HODE due to ALOX15 upregulation contributes to alcohol-induced liver injury in mice
Source: PubMed Central journal article supplement (PMC5567196; doi:10.1038/s41598-017-02759-0), 2017-08-21

Hepatic overproduction of 13-HODE due to ALOX15 upregulation contributes to alcohol-induced liver injury in mice

Wenliang Zhang<sup>1</sup>, Wei Zhong<sup>1</sup>, Qian Sun<sup>1</sup>, Xinguo Sun<sup>1</sup>, Zhanxiang Zhou<sup>1,2,\*</sup>

**DCF****BF****TUNEL****Ctrl**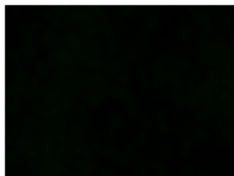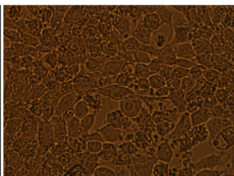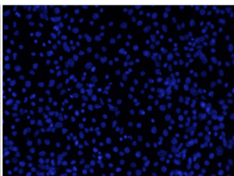**13-HODE**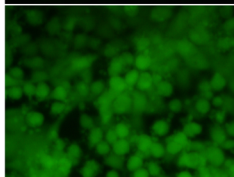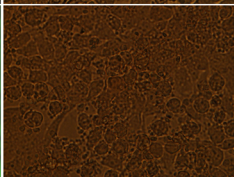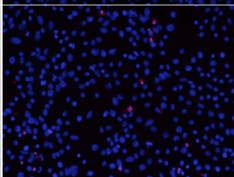**NAC**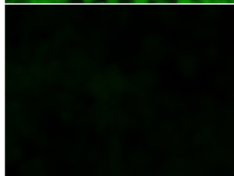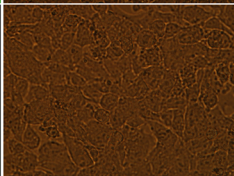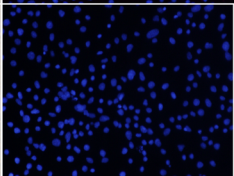**13-HODE/NAC**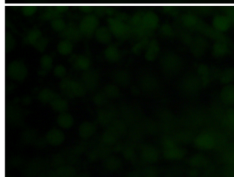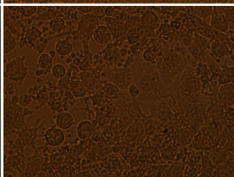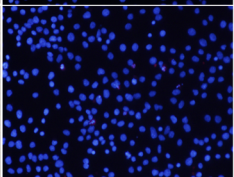

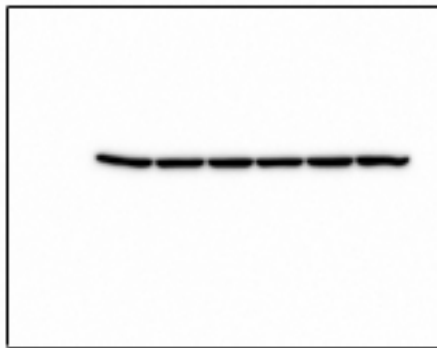

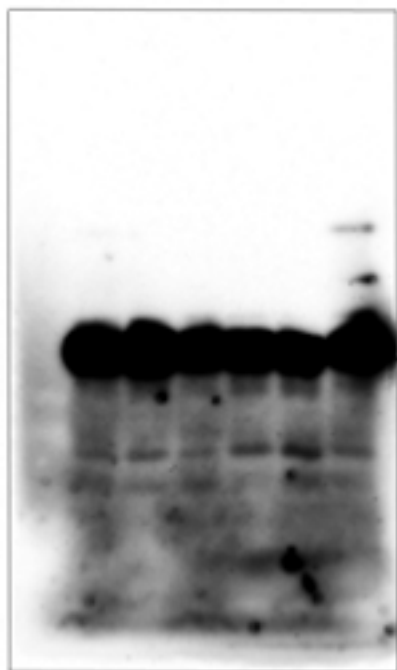

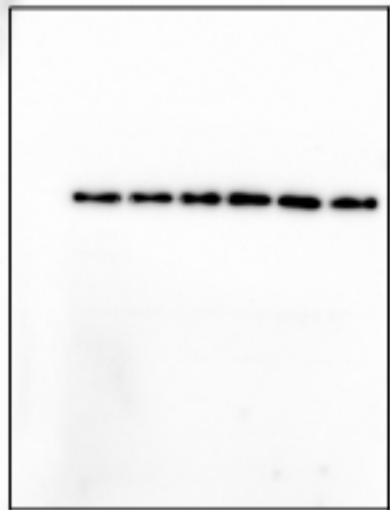

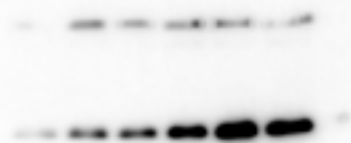

— — — — —

\_\_\_\_\_



— — — — —

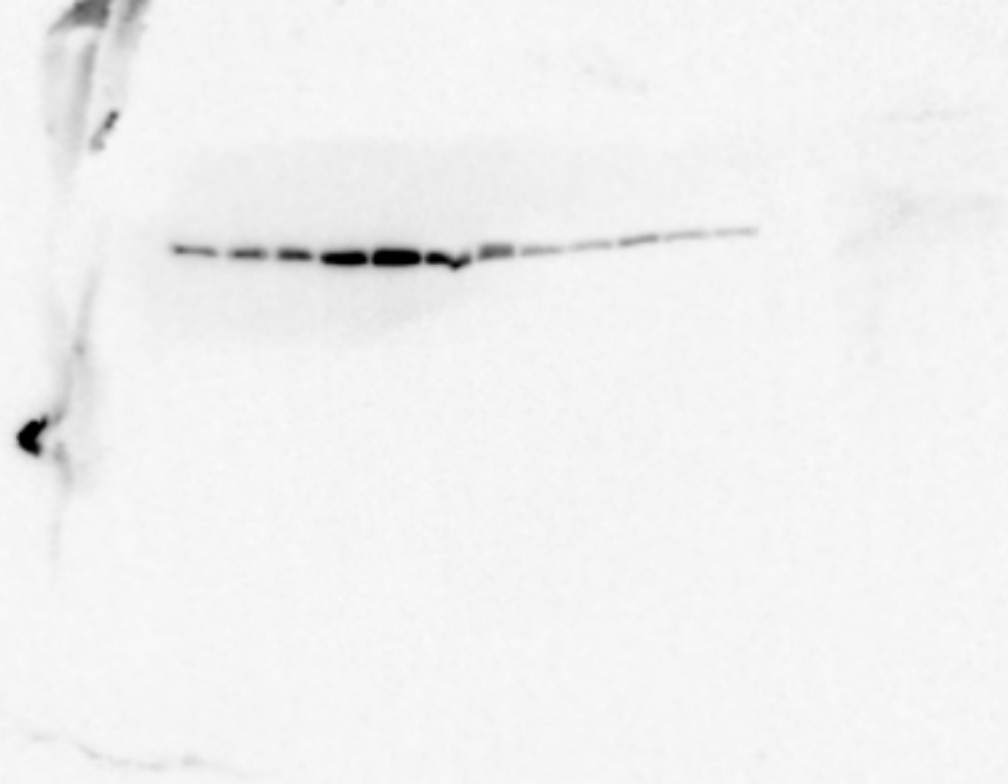

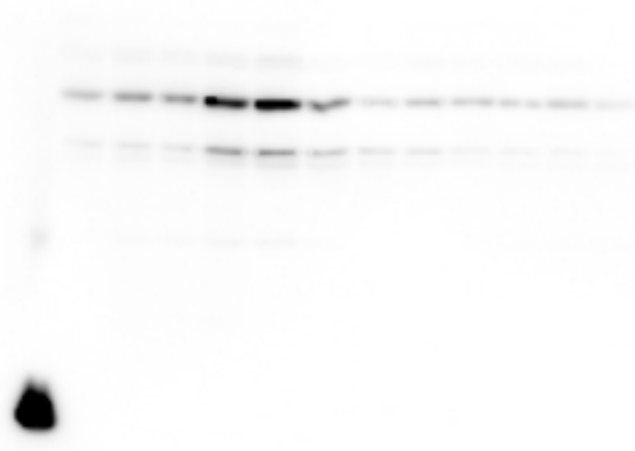

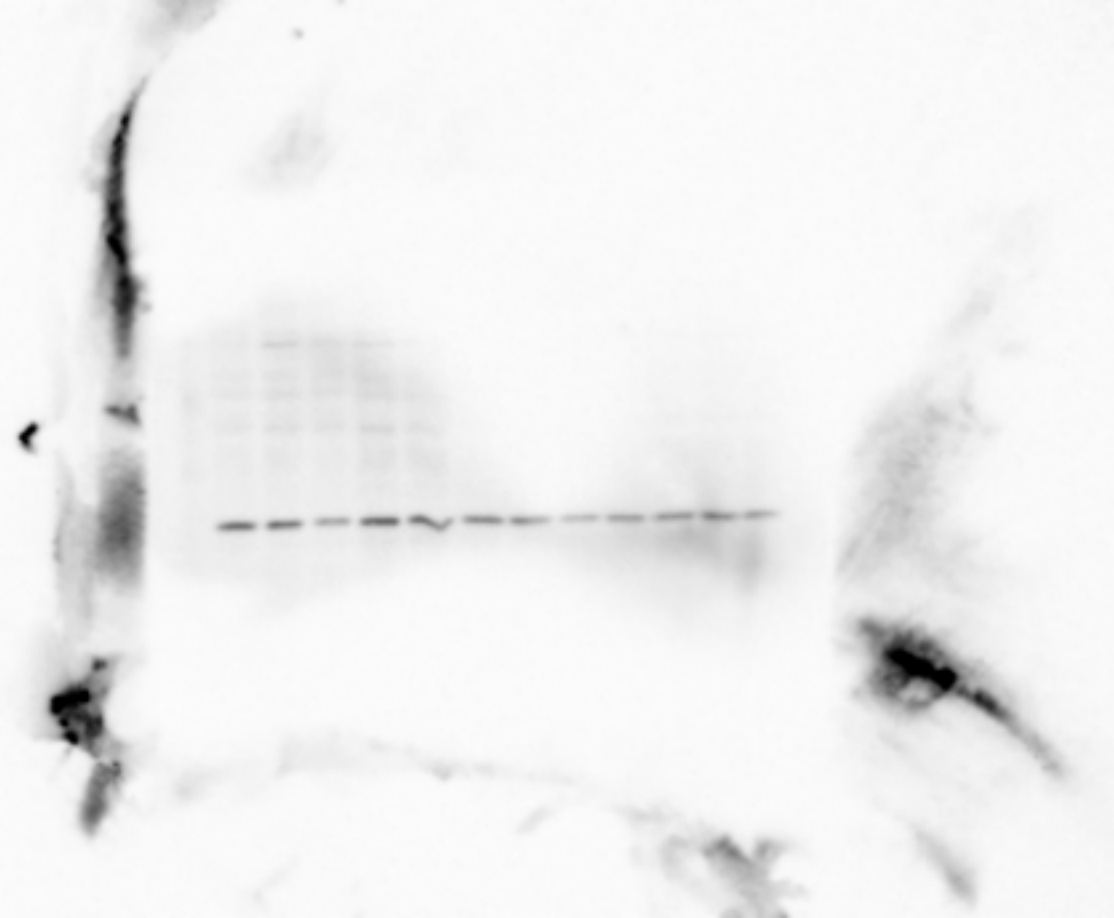

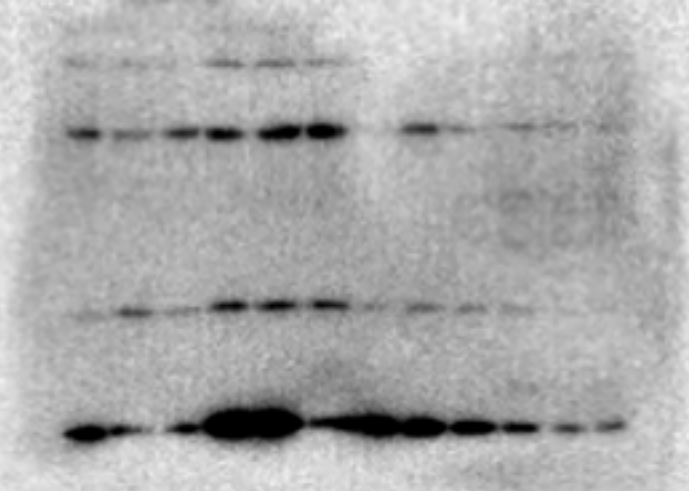

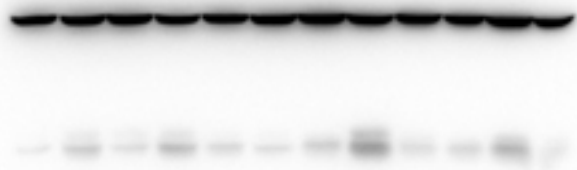

—

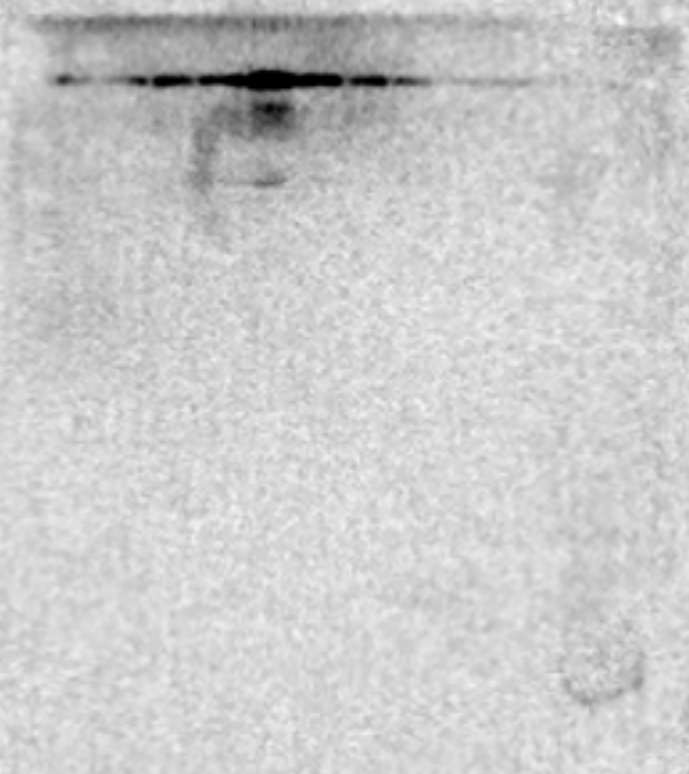



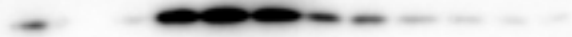

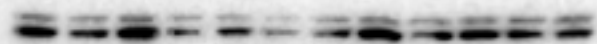

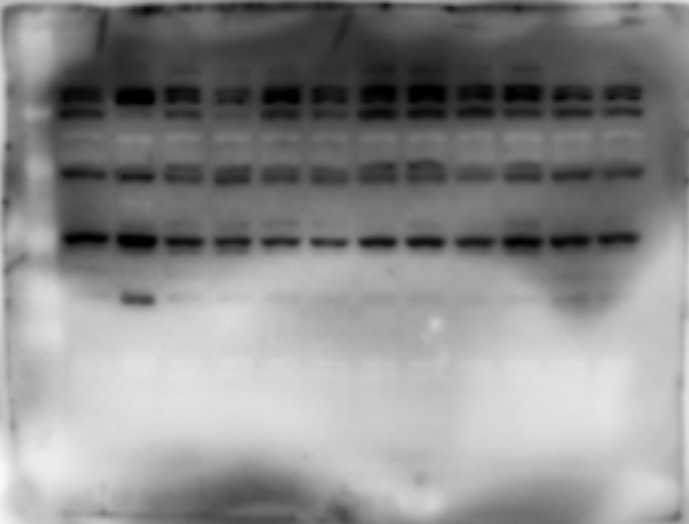

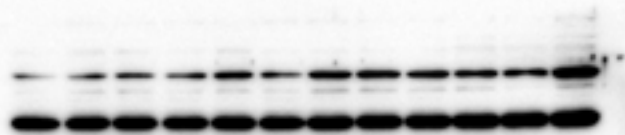

-----

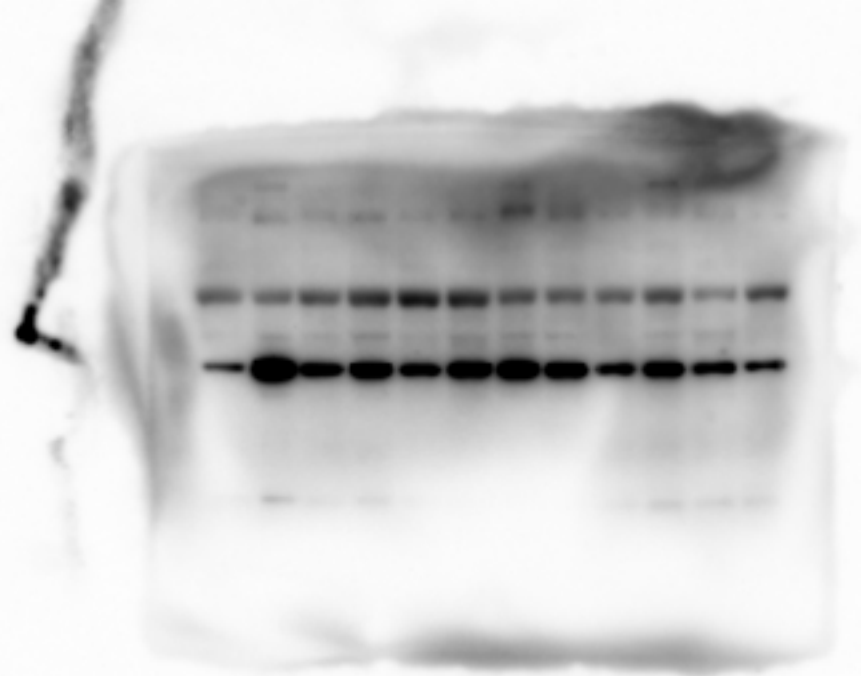

\_\_\_\_\_

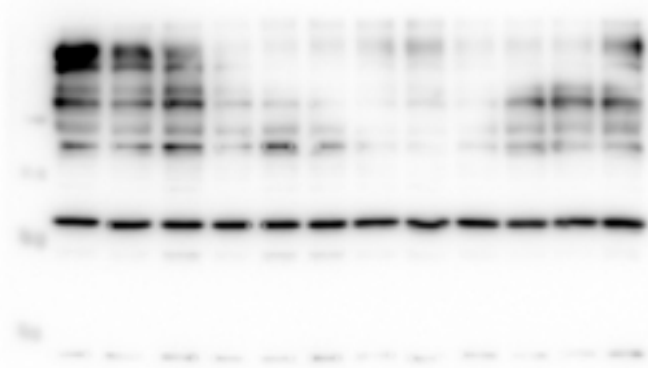



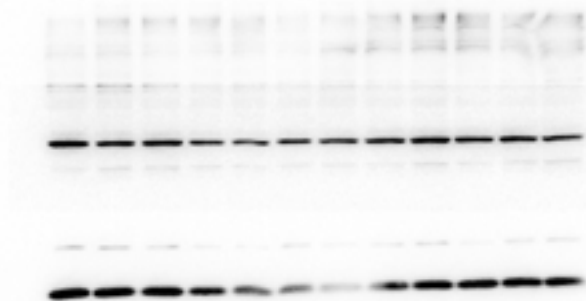

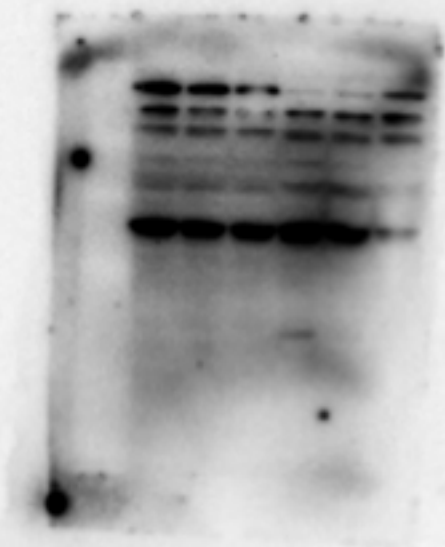

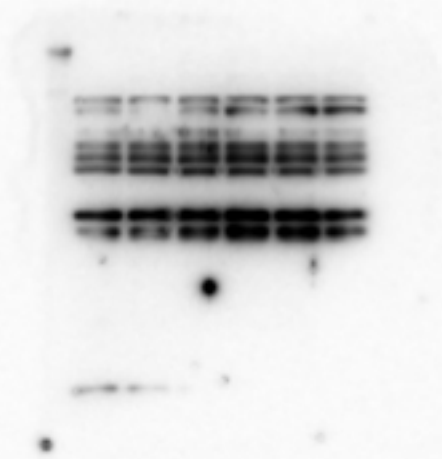

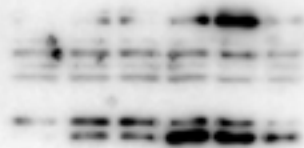

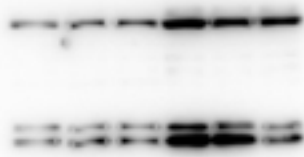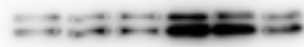

—

\_\_\_\_\_





\_\_\_\_\_

\_\_\_\_\_

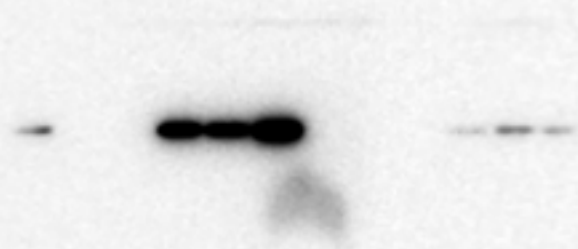

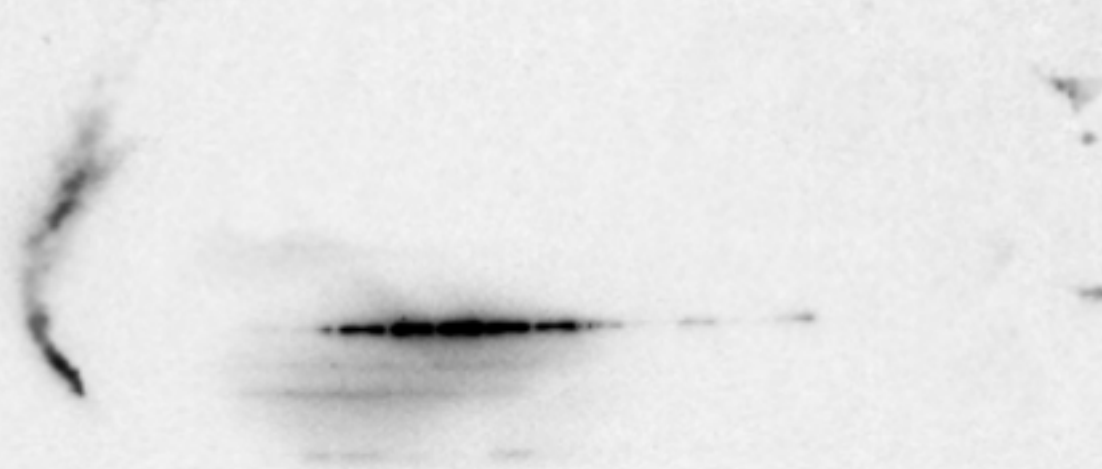

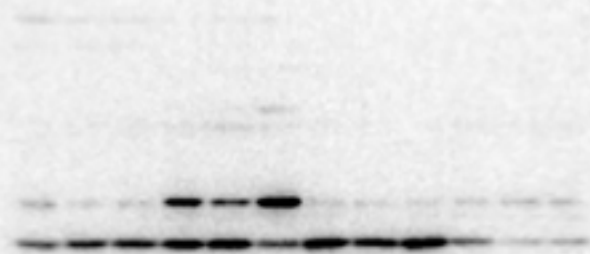

\_\_\_\_\_

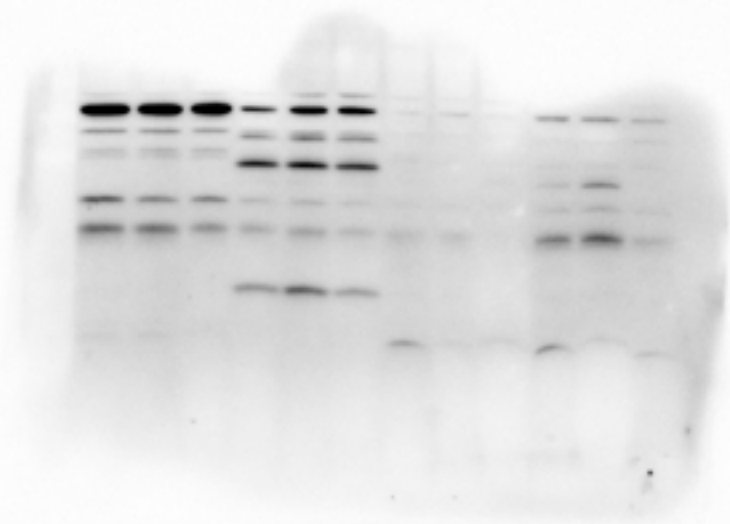

\_\_\_\_\_

\_\_\_\_\_

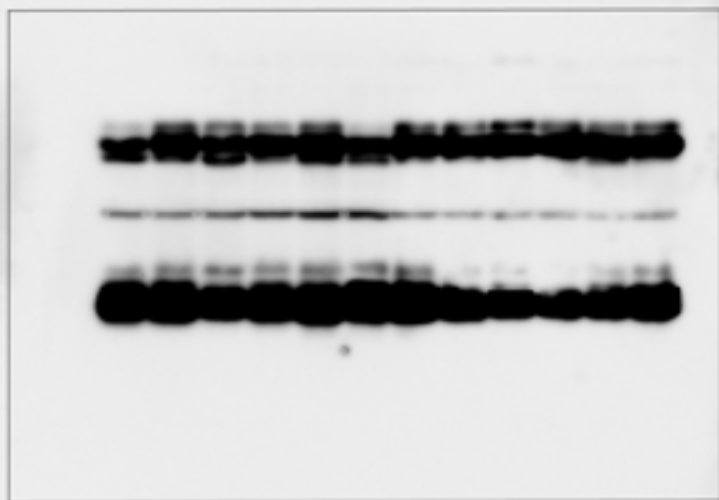



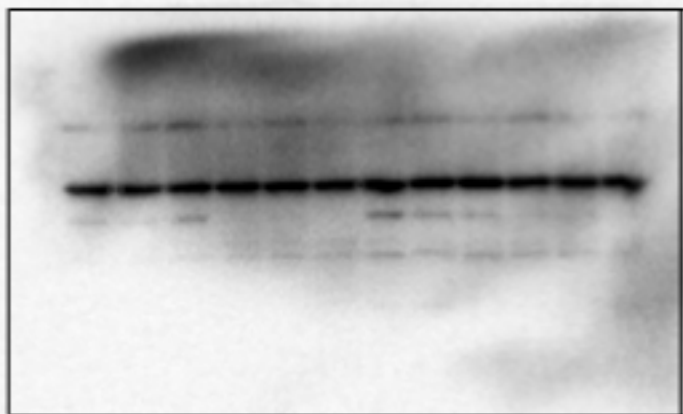

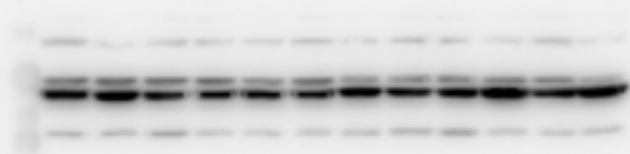

100 100 100 100 100 100 100 100 100 100

100 100 100 100 100 100 100 100 100 100

100 100 100 100 100 100 100 100 100 100

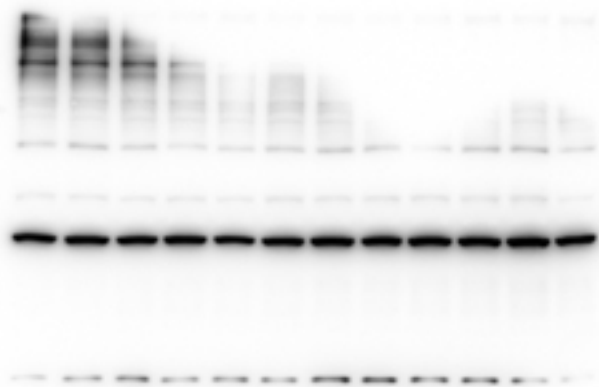

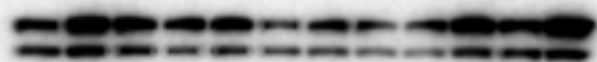

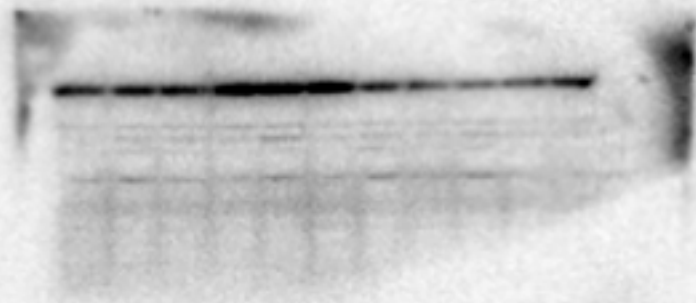

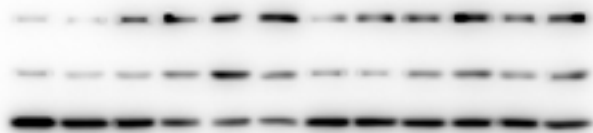

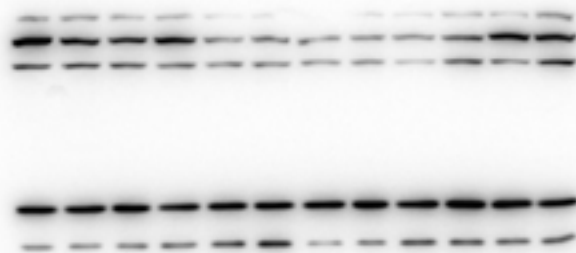



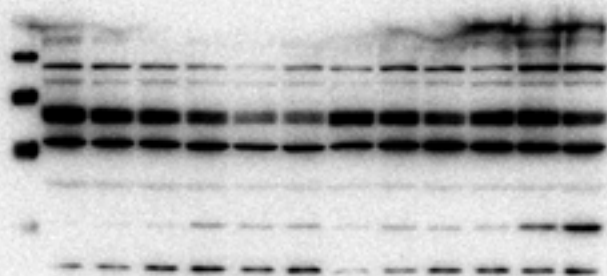

Supplement: 41598_2017_2759_MOESM1_ESM.pdf [file 41598_2017_2759_MOESM1_ESM.pdf]
